# Supplementary material
Source: PubMed Central journal article supplement (PMC3667668)

## The E288K Colon Tumor Variant of DNA Polymerase Beta Is a Sequence Specific Mutator (Supporting Information)

Drew L. Murphy<sup>§</sup>, Katherine A. Donigan<sup>√</sup>, Joachim Jaeger<sup>‡</sup>, and Joann B. Sweasy\*<sup>§√</sup>

<sup>§</sup>Department of Therapeutic Radiology and <sup>√</sup>Department of Genetics, Yale University School of Medicine, New Haven, Connecticut 06520, and <sup>‡</sup>Wadsworth Center, New York State Department of Health, Center for Medical Science, 150 New Scotland Avenue, Albany, New York 12208

\* To whom correspondence should be addressed.

E-mail: joann.sweasy@yale.edu

Department of Therapeutic Radiology and Genetics.

Yale University School of Medicine.

New Haven, CT 06520

Tel.: 203-737-2626

Fax: 203-785-6309

**Table S1. PCR and Sequencing Primers**

| Primer  | Sequence (5' to 3')                     | Purpose                                                                                                    |
|---------|-----------------------------------------|------------------------------------------------------------------------------------------------------------|
| E288K F | GAGAGCGCATGCCCTG <b>AAA</b> AAGGGCTTCAC | Mutagenenic PCR primers used in the site-directed mutagenesis reaction for the E288K variant. <sup>1</sup> |
| E288K R | GTGAAGCCCTT <b>TTT</b> CAGGGCATGCGCTCTC |                                                                                                            |
| cII F   | ACCACACCTATGGTGTATGCA                   | PCR and sequencing primers for the <i>λcII</i> gene.                                                       |
| cII R   | GTCAATAAGACTCCTGTTGA                    |                                                                                                            |

<sup>1</sup> Codon 288 is shown in **bold** with the mutation underlined.

**Table S2. DNA Oligonucleotides**

DNA oligonucleotides that were used to construct the one-base gapped DNA substrates (Table 1) used in this study.

| Oligo | Sequence 5' to 3'                             |
|-------|-----------------------------------------------|
| AP    | GGATTTGTTTCAGAACGCTCGGT                       |
| AD    | GCCGCCGGGCGTTTGTATTGG                         |
| AT    | CCAATAACAAACGCCCGGCGCAACCGAGCGTTCTGAACAAATCC  |
| CP    | TCTTGAATGGTGGGTCGTTGAC                        |
| CD    | ACGACATGGCTCGATTGGCGCG                        |
| CT    | CGCGCCAATCGAGCCATGTCGTCGTCAACGACCCACCATTCAAGA |
| GP    | CGCGCCAATCGAGCCATGTCGT                        |
| GD    | GTCAACGACCCACCATTCAAGA                        |
| GT    | TCTTGAATGGTGGGTCGTTGACGACGACATGGCTCGATTGGCGCG |
| TP    | CCAATAACAAACGCCCGGCGGC                        |
| TD    | TCCGAGCGTTCTGAACAAATCC                        |
| TT    | GGATTTGTTTCAGAACGCTCGGATGCCGCCGGGCGTTTGTATTGG |

**Figure S1. Circular Dichroism Spectra (a) and Thermal Denaturation Curves (b)**

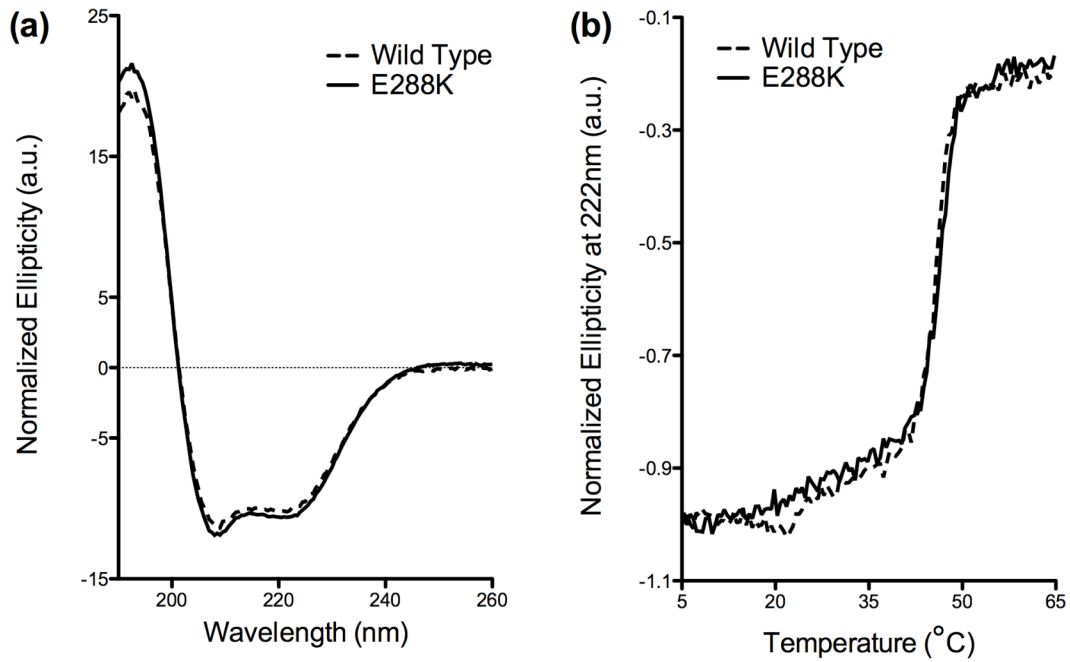

**Figure S2. Pol Beta Expression in C127λb Cells**

Western blot for pol beta. Exogenous HA-tagged pol beta E288K (pol beta-HA) is only expressed in the absence of Tet (NT), while endogenous wild-type pol beta (pol beta) can be seen in both Tet (T) and NoTet (NT) samples.

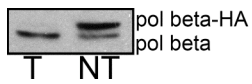

### Figure S3. *λcII* Mutation Spectrum

DNA from cells either exogenously expressing E288K (NoTet) or not (Tet) was packaged into phage and DNA from mutant plaques was isolated, amplified, and sequenced. Mutations found in the *cII* gene of mutant plaques are compiled on the wild-type *cII* gene sequence. Mutations found in the DNA from cells expressing E288K (NoTet) are in red above the wild-type sequence, and mutations found in the DNA from cells not expressing E288K (Tet) are in blue below the wild-type sequence. (△ - one-base deletion; ▲ - one-base insertion)

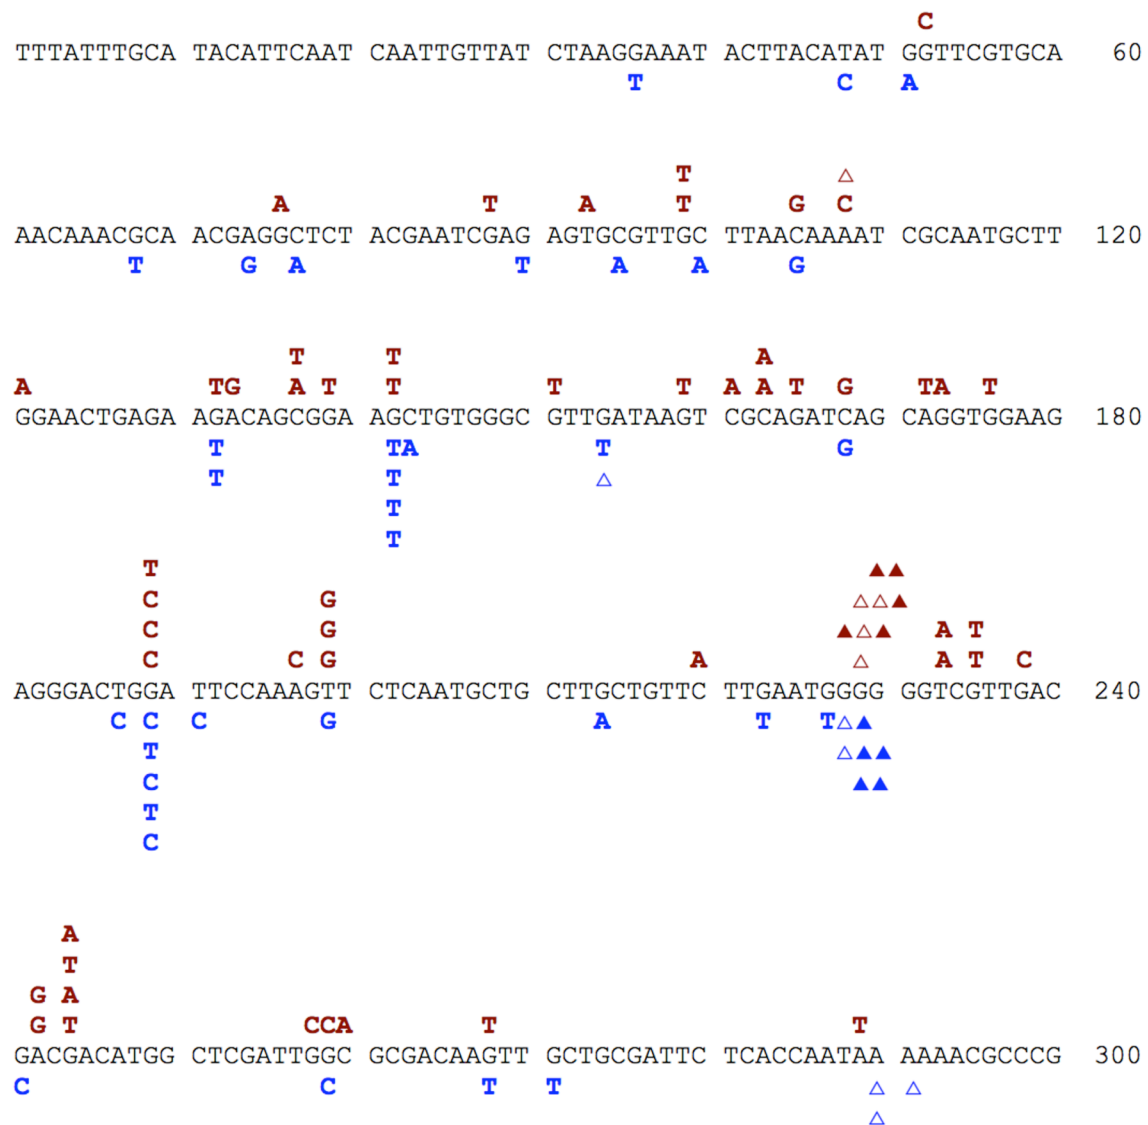

Supplement: NIHMS399539-supplement-Supplementary_documents.pdf [file NIHMS399539-supplement-Supplementary_documents.pdf]
